# Supplementary material for: Prognostic significance of combined Lymphocyte-monocyte Ratio and Tumor-associated Macrophages in Gastric Cancer Patients after Radical Resection
Source: PubMed Central journal article supplement (PMC7378932; doi:10.7150/jca.44440), 2020-06-28
Supplement: jcav11p5078s1.pdf [file jcav11p5078s1.pdf]

**Table S1. Comparison of the Prognostic Accuracies of Different Models**

| <b>RFS</b>  | <b>C-index</b> | <b>95% CI</b> | <b>p value*</b>  |
|-------------|----------------|---------------|------------------|
| TNM         | 0.7428         | 0.7029-0.7828 | /                |
| TNM+LMR     | 0.7693         | 0.7263-0.8123 | <b>0.012</b>     |
| TNM+TAM     | 0.7917         | 0.7464-0.8369 | <b>&lt;0.001</b> |
| TNM+LMR+TAM | 0.8036         | 0.7612-0.8459 | <b>&lt;0.001</b> |
| <b>OS</b>   | <b>C-index</b> | <b>95% CI</b> | <b>p value*</b>  |
| TNM         | 0.7699         | 0.7374-0.8024 | /                |
| TNM+LMR     | 0.7994         | 0.7622-0.8364 | <b>0.015</b>     |
| TNM+TAM     | 0.8127         | 0.7776-0.8479 | <b>&lt;0.001</b> |
| TNM+LMR+TAM | 0.8328         | 0.7988-0.8668 | <b>&lt;0.001</b> |

\*Comparison of C-index between the TNM and other prognostic models.

C-index indicates Harrell concordance index

**Low CD68+ expression**

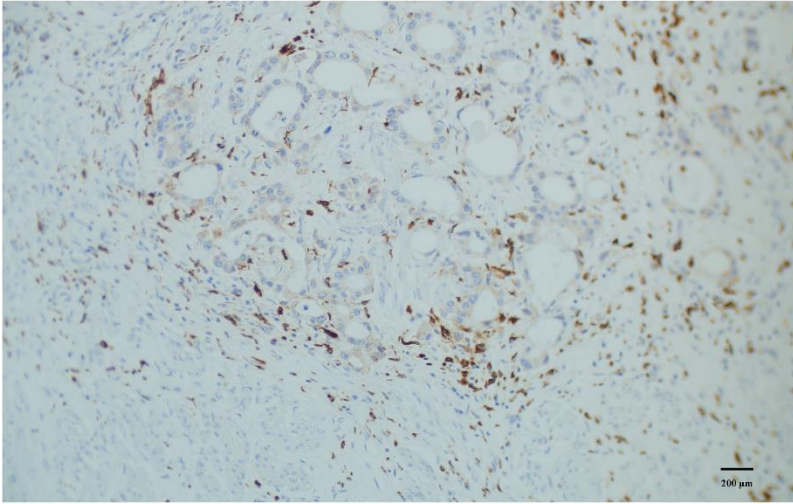

**High CD68+ expression**

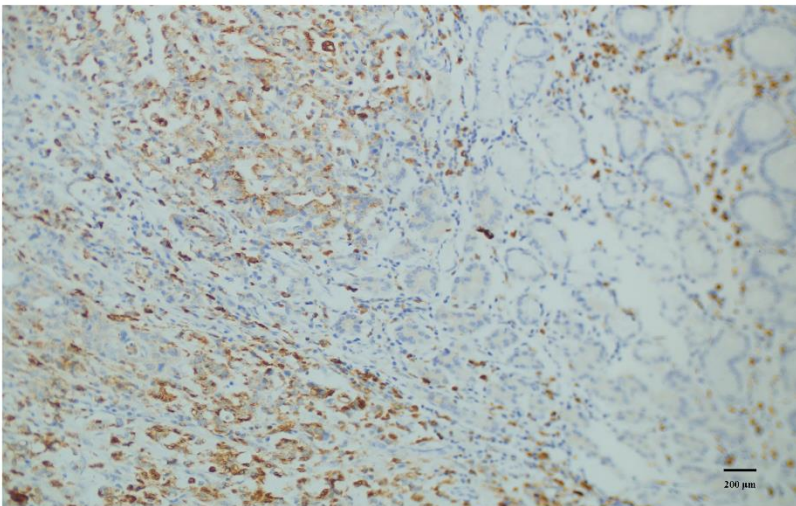

**Fig.S1**

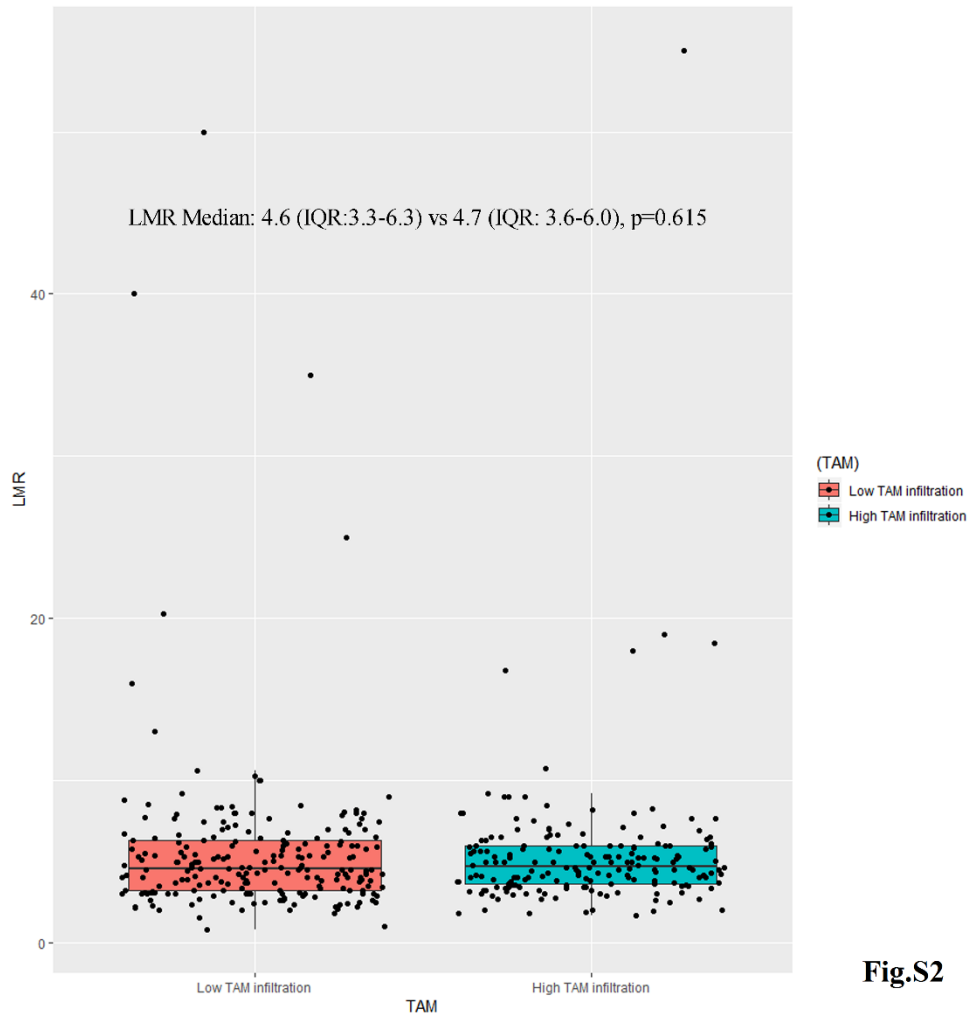

**Fig.S2**

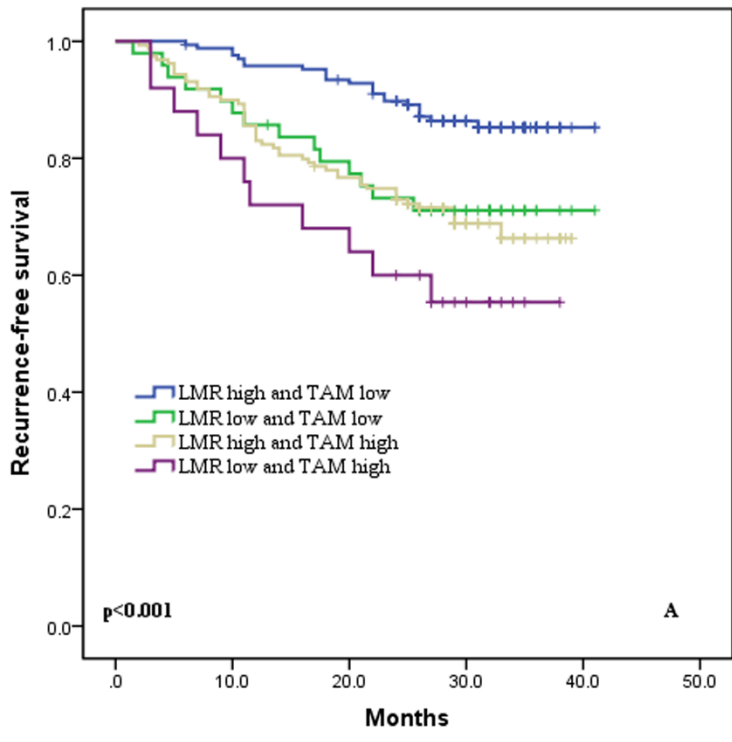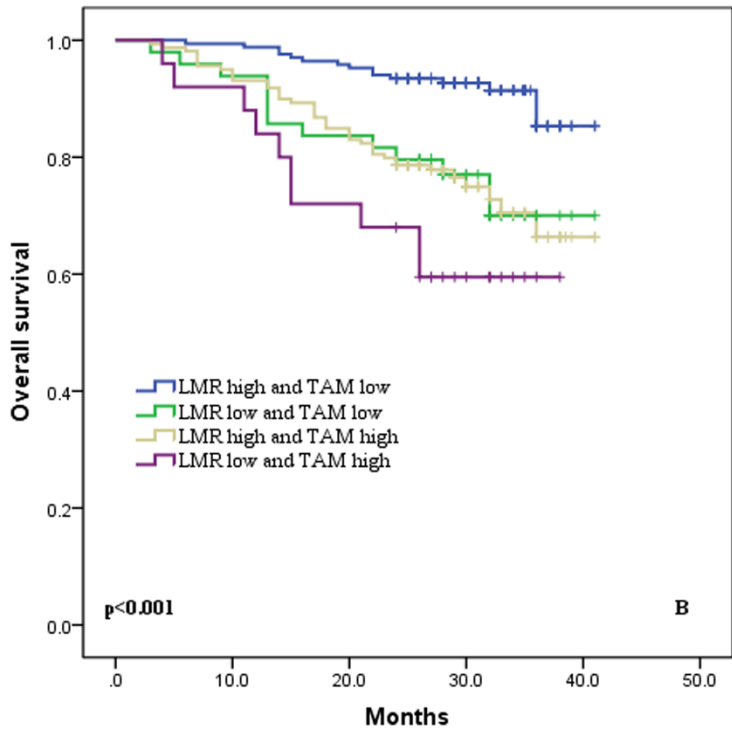

Fig. S3
